# Supplementary material for: Drug resistance profiling of asymptomatic and low-density Plasmodium falciparum malaria infections on Ngodhe island, Kenya, using custom dual-indexing next-generation sequencing
Source: PubMed Central journal article supplement (PMC10349106; doi:10.1038/s41598-023-38481-3), 2023-07-14
Supplement: 41598_2023_38481_MOESM1_ESM.pdf [file 41598_2023_38481_MOESM1_ESM.pdf]

Figure S1: Flow chart describing the bioinformatic pipeline of analysis from raw sequencing reads to variant calling.

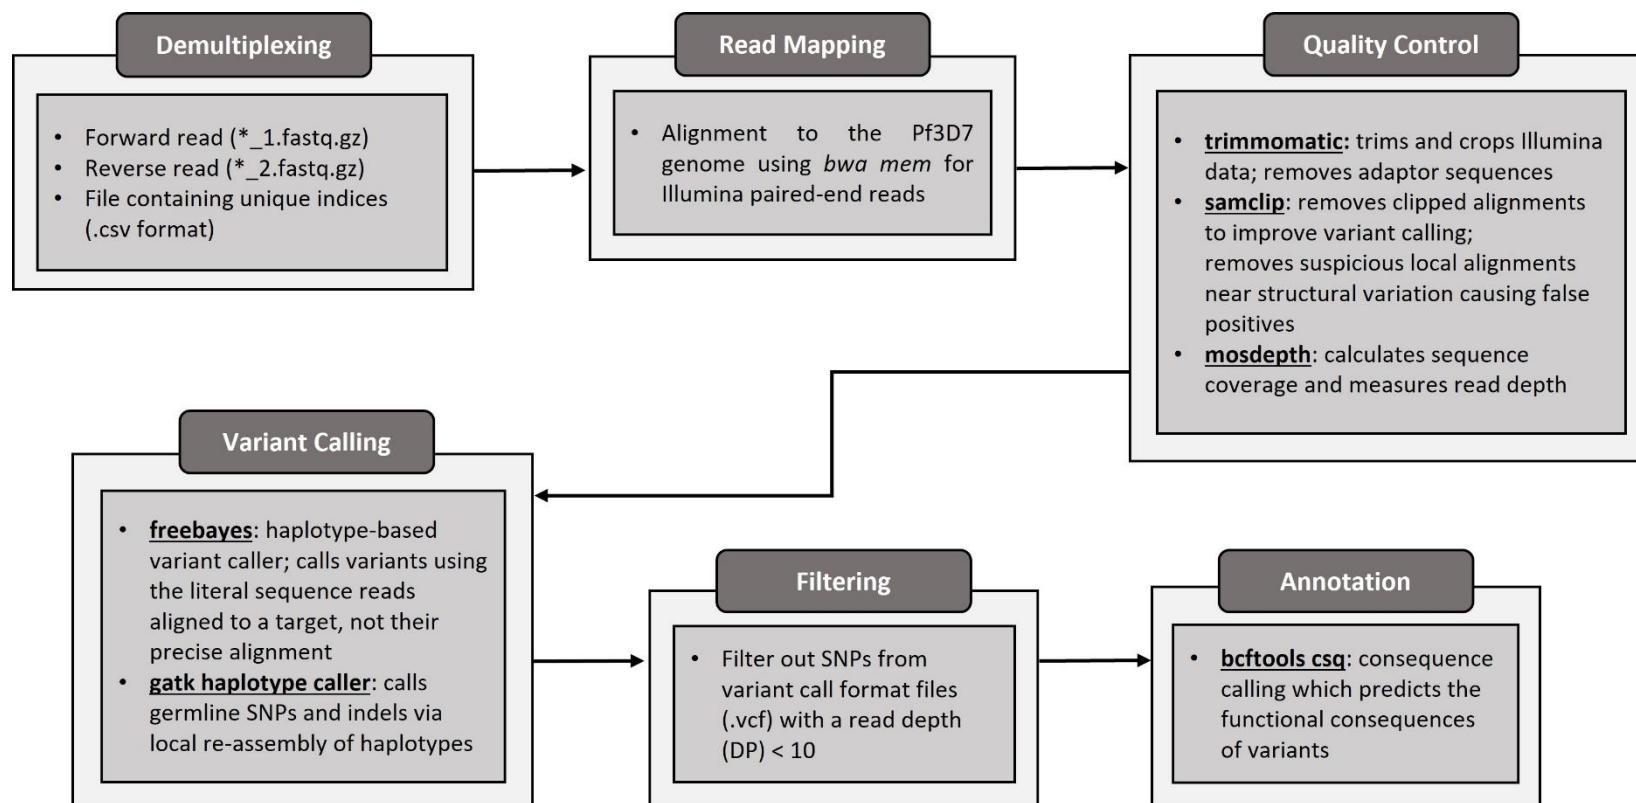

**Table S1: Read depth of sequencing reads across the 5 sequenced resistance genes ( $n = 70$ ).**

| <b>Gene</b>   | <b>Median</b> | <b>Max</b> |
|---------------|---------------|------------|
| <i>Pfcrt</i>  | 155           | 471        |
| <i>Pfmdr1</i> | 69            | 3962       |
| <i>Pfdhps</i> | 103           | 2793       |
| <i>Pfdhfr</i> | 126           | 2604       |
| <i>Pfk13</i>  | 1760          | 31280      |

**Table S2: Primers used for the amplification of amplicons on *Pfcrt*, *Pfmdr1*, *Pfdhps*, *Pfdhfr*, and *Pfk13*. (PCR reaction; S = simplex reaction, M = Multiplex reaction).**

| <b>Amplicon name</b> | <b>Gene ID</b> | <b>Primer Sequence</b>                    | <b>PCR reaction</b> |
|----------------------|----------------|-------------------------------------------|---------------------|
| <i>Pfcrt</i>         | PF3D7_0709000  | Forward: TCTTGTCTTGGTAAATGTGCTCA          | S1                  |
|                      |                | Reverse: AGGCCAAAATGACTGAACAGG            |                     |
| <i>Pfmdr1.1</i>      | PF3D7_0523000  | Forward: CGTTTAAATGTTTACCTGCACAAC         | M1                  |
|                      |                | Reverse: TGACACCACAAACATAAATTAACGG        |                     |
| <i>Pfmdr1.7</i>      | PF3D7_0523000  | Forward: TTTGTCCAATTGTTGCAGCTGTATTAAC TTT | M4                  |
|                      |                | Reverse: TGCATTTTCTGAATCTCCTTTTAAGGACATT  |                     |
| <i>Pfmdr1.8</i>      | PF3D7_0523000  | Forward: GGTAAGTTGATATTAAGATGTAAATTTCC    | M3                  |
|                      |                | Reverse: TGGTCCAACATTTGTATCATATTTATTTGG   |                     |
| <i>Pfdhfr</i>        | PF3D7_0417200  | Forward: ATGATGGAACAAGTCTGCGACGTTTTTCGA   | M2                  |
|                      |                | Reverse: CTAAAAATTCTTGATAAACAACGGAACCTCC  |                     |
| <i>Pfdhps.3</i>      | PF3D7_0810800  | Forward: ACCATCAGATGTTTATATAACAAATATGTG   | M3                  |
|                      |                | Reverse: CTGGATTATTTGTACAAGCACTAATATCA    |                     |
| <i>Pfdhps.4</i>      | PF3D7_0810800  | Forward: AGAATGTGTTGATAATGATTTAGTTGATAT   | M4                  |
|                      |                | Reverse: GATATAAAAGTTGATCCTTGTCTTTCT      |                     |
| <i>PfK13.4</i>       | PF3D7_1343700  | Forward: TAAGTGGAAGACATCATGTAACCAGAGA     | M2                  |
|                      |                | Reverse: CTTCTACATTCGGTATAATAGAAGAGCC     |                     |
| <i>PfK13.5</i>       | PF3D7_1343700  | Forward: ATGATGGCTCTTCTATTATACCGAATG      | M1                  |
|                      |                | Reverse: GCTATTAACCGGAGTGACCAAATCTG       |                     |
